# Supplementary material for: Octanoic acid mitigates busulfan-induced blood-testis barrier damage by alleviating oxidative stress and autophagy
Source: Springer Nature journal article supplement (doi:10.1186/s12944-024-02157-2), 2024-06-11
Supplement: MOESM1 [file 12944_2024_2157_MOESM1_ESM.pdf]

638505165911702951

## Sources Overview

10%

OVERALL SIMILARITY

|    |                                                                                                                                                      |     |
|----|------------------------------------------------------------------------------------------------------------------------------------------------------|-----|
| 1  | www.ncbi.nlm.nih.gov<br>INTERNET                                                                                                                     | 1%  |
| 2  | www.mdpi.com<br>INTERNET                                                                                                                             | <1% |
| 3  | www.frontiersin.org<br>INTERNET                                                                                                                      | <1% |
| 4  | respiratory-research.biomedcentral.com<br>INTERNET                                                                                                   | <1% |
| 5  | Yuming Feng, Shanmeizi Zhao, Rong Ju, Jianbo Li et al. "The therapeutic effect and metabolic mechanism analysis of Guilingji on idiop...<br>CROSSREF | <1% |
| 6  | digital.csic.es<br>INTERNET                                                                                                                          | <1% |
| 7  | www.aging-us.com<br>INTERNET                                                                                                                         | <1% |
| 8  | Yongtao Liu, Yuntao Wang, Jianmin Zhang, Zhen Wang et al. "Regulation of survival, growth performance, and intestinal health of larg...<br>CROSSREF  | <1% |
| 9  | ovarianresearch.biomedcentral.com<br>INTERNET                                                                                                        | <1% |
| 10 | Shuxian Wang, Qiwei Chen, Yu Zhang, Feng Zheng et al. "Omega-3 polyunsaturated fatty acids alleviate hydrogen sulfide-induced bloo...<br>CROSSREF    | <1% |
| 11 | www.spandidos-publications.com<br>INTERNET                                                                                                           | <1% |
| 12 | Jianan Zhao, Minxin Wang, Yanan Wang, Jinyu Xu, Chenxu Ma, Yu Tang, QianQian Luo, Hongqin Zhang, Feibo Xu. "Endoplasmic reticul...<br>CROSSREF       | <1% |
| 13 | www.jcancer.org<br>INTERNET                                                                                                                          | <1% |
| 14 | Jing-Bo Liu, Kai Chen, Zi-Fa Li, Zhen-Yong Wang, Lin Wang. "Glyphosate-induced gut microbiota dysbiosis facilitates male reproductive...<br>CROSSREF | <1% |
| 15 | Shanmeizi Zhao, Rujun Ma, Kadiliya Jueraitetibaik, Yao Xu et al. "ZDHHC17 participates in the pathogenesis of polycystic ovary syndr...<br>CROSSREF  | <1% |
| 16 | Zhao, Jiaqiang, Lizhi Peng, Wenhua Zheng, Rikang Wang, Lei Zhang, Jian Yang, and Heru Chen. "Chemically Bonding of Amantadine wi...<br>CROSSREF      | <1% |
| 17 | fjfsdata01prod.blob.core.windows.net<br>INTERNET                                                                                                     | <1% |

|    |                                                                                                                                                        |     |
|----|--------------------------------------------------------------------------------------------------------------------------------------------------------|-----|
| 18 | Jiabao Tang, Xiaohua Li, Wei Li, Chun Cao. "The effects of enteral nutrition supplemented with octanoic acid on LPS-induced intestinal ...<br>CROSSREF | <1% |
| 19 | evcna.com<br>INTERNET                                                                                                                                  | <1% |
| 20 | link.springer.com<br>INTERNET                                                                                                                          | <1% |
| 21 | www.karger.com<br>INTERNET                                                                                                                             | <1% |
| 22 | LEE, Beom-Jun, Eun-Yong JUNG, Young-Won YUN, Jong-Koo KANG, In-Jeoung BAEK, Jung-Min YON, Yoon-Bok LEE, Heon-Soo SOHN, ...<br>CROSSREF                 | <1% |
| 23 | Tian-Hao Wang, Bi-Chen Zhao, Jin-Yang Li, Milton Talukder, Jin-Long Li. "Connexin-43 is a promising target for lycopene preventing pht...<br>CROSSREF  | <1% |
| 24 | Jing-Bo Liu, Zi-Fa Li, Lu Lu, Zhen-Yong Wang, Lin Wang. "Glyphosate damages blood-testis barrier via NOX1-triggered oxidative stress ...<br>CROSSREF   | <1% |
| 25 | Tayyaba Afsar, Suhail Razak, Janeen H. Trembley, Khushbukhat Khan et al. "Prevention of Testicular Damage by Indole Derivative MMI...<br>CROSSREF      | <1% |
| 26 | Xiaoyu Zhang, Qin Xia, Rui Wei, Hongfei Song, Jiaqi Mi, Zhaoyu Lin, Yang Yang, Zijie Sun, Kang Zou. "Melatonin protects spermatogoni...<br>CROSSREF    | <1% |
| 27 | assets.researchsquare.com<br>INTERNET                                                                                                                  | <1% |
| 28 | erj.ersjournals.com<br>INTERNET                                                                                                                        | <1% |
| 29 | www.amcmh.org<br>INTERNET                                                                                                                              | <1% |
| 30 | Bo Li, Xin He, Mengru Zhuang, Bowen Niu et al. "Melatonin Ameliorates Busulfan-Induced Spermatogonial Stem Cell Oxidative Apoptos...<br>CROSSREF       | <1% |
| 31 | Jun Jing, Lei Ouyang, Hong Zhang, Kuan Liang et al. " Omega-3 polyunsaturated fatty acids and its metabolite rescue busulfan disrup...<br>CROSSREF     | <1% |
| 32 | Miri Park, Hye-Bin Lee, Ha Ram Kim, Min-Cheol Kang, Duyun Jeong, Hee-Don Choi, Jung Sun Hong, Ho-Young Park. "Resistant starch-e...<br>CROSSREF        | <1% |
| 33 | Shuyi Jiang, Ying Xu, Yunxia Fan, Ying Hu, Qiang Zhang, Wenhui Su. "Busulfan impairs blood–testis barrier and spermatogenesis by in...<br>CROSSREF     | <1% |
| 34 | Yankang Cui, Chenkui Miao, Shouyong Liu, Jingyuan Tang et al. "Clusterin suppresses invasion and metastasis of testicular seminoma...<br>CROSSREF      | <1% |
| 35 | journals.plos.org<br>INTERNET                                                                                                                          | <1% |
| 36 | www.oaepublish.com<br>INTERNET                                                                                                                         | <1% |
| 37 | www.science.gov<br>INTERNET                                                                                                                            | <1% |
| 38 | www2.mdpi.com<br>INTERNET                                                                                                                              | <1% |
| 39 | "Autophagy: Biology and Diseases", Springer Science and Business Media LLC, 2019<br>CROSSREF                                                           | <1% |
| 40 | Jihua Xu, Xiang Zhang, Xiaohong Sun, Qiang Lv, Yugang Zhang. "Red-Fleshed Apple Anthocyanin Extracts Attenuate Male Reproductiv...<br>CROSSREF         | <1% |
| 41 | AMOURA M. ABOU-EL-NAGA, SHAKER A. MOUSA, FAYEZ ALTHOBAITI, EMAN FAYAD, ENG Y S. FAHIM. "Ameliorative effects of melatoni...<br>CROSSREF                | <1% |

|    |                                                                                                                                              |          |     |
|----|----------------------------------------------------------------------------------------------------------------------------------------------|----------|-----|
| 42 | Faridah Hanim Shakirin, Azrina Azlan, Amin Ismail, Zulkhairi Amom, Lau Cheng Yuon. " Protective Effect of Pulp Oil Extracted from Miq...     | CROSSREF | <1% |
| 43 | Marzieh Zeinvand-Lorestani, Samaneh Karimi, Layasadat Khorsandi. "Quercetin ameliorates cytotoxic effects of zinc oxide nanopartic...        | CROSSREF | <1% |
| 44 | Rujun Ma, Hongru Li, Yu Zhang, Ying Lin, Xuhua Qiu, Min Xie, Bing Yao. "The toxic effects and possible mechanisms of Brusatol on mou...      | CROSSREF | <1% |
| 45 | Yuan Yang, Guoqing Fu, Xueyi Zhao, Xiaoping Wu et al. "Perfluorooctanoic acid induces tight junction injury of Sertoli cells by blocking ... | CROSSREF | <1% |

Excluded search repositories:

- None

Excluded from document:

- Bibliography

Excluded sources:

- None

Excluded preprints

- None

**Octanoic acid mitigates busulfan-induced blood–testis barrier damage by alleviating oxidative stress and autophagy**

Chun Cao<sup>a,1</sup>, Hong Zhang<sup>b,1</sup>, Zhaowanyue He<sup>b,1</sup>, Kemei Zhang<sup>c</sup>, Zhang Qian<sup>b</sup>, Jiaming Shen<sup>b</sup>, Lu Zheng<sup>b</sup>, Mengqi Xue<sup>c</sup>, Shanshan Sun<sup>d</sup>, Chuwei Li<sup>b</sup>, Wei Zhao<sup>b</sup>, Jun Jing<sup>c</sup>, Rujun Ma<sup>a,b</sup>, Xie Ge<sup>a,b,\*</sup>, Bing Yao<sup>a,c,d,\*</sup>.

**Author affiliations**

<sup>a</sup> Department of Reproductive Medicine, Affiliated Jinling Hospital, The First School of Clinical Medicine, Southern Medical University, Nanjing, 210002, China

<sup>b</sup> Center of Reproductive Medicine, Jinling Hospital, Affiliated Hospital of Medical School, Nanjing University, Nanjing, Jiangsu, 210002, China

<sup>c</sup> Reproductive Medical Center, Jinling Hospital Department, Nanjing Medical University, Nanjing, Jiangsu, 210002, China

<sup>d</sup> College of Life Sciences, Nanjing Normal University, Nanjing, Jiangsu, 210023, China

<sup>1</sup> These authors contributed equally: Chun Cao, Hong Zhang, Zhaowanyue He.

**\* Correspondence:**

Bing Yao, PhD

Department of Reproductive Medicine, Affiliated Jinling Hospital, The First School of Clinical Medicine, Southern Medical University, Nanjing, China. 305 Zhongshan East Road.

E-mail: [yaobing@nju.edu.cn](mailto:yaobing@nju.edu.cn)

Tel numbers: +86 138 158 53296

Xie Ge, PhD

Center of Reproductive Medicine, Jinling Hospital, Affiliated Hospital of Medical School, Nanjing University, Nanjing, Jiangsu, China. 305 Zhongshan East Road.

E-mail: [gexie85@163.com](mailto:gexie85@163.com)

Tel numbers: +86 183 629 52185

30

## 31 Abstract

32 **Background:** The management of male infertility continues to encounter an array of challenges and  
33 constraints, necessitating an in-depth exploration of novel therapeutic targets to enhance its efficacy.  
34 As an eight-carbon medium-chain fatty acid, octanoic acid (OCA) shows promise for improving  
35 health, yet its impact on spermatogenesis remains inadequately researched.

36 **Methods:** Mass spectrometry was performed to determine the fatty acid content and screen for a  
37 pivotal lipid component in the serum of patients with severe spermatogenesis disorders. The sperm  
38 quality was examined, and histopathological analysis and biotin tracer tests were performed to  
39 assess spermatogenesis function and the integrity of the blood-testis barrier (BTB) *in vivo*. To  
40 investigate the effects of OCA administration on Sertoli cell dysfunction, cell-based *in vitro*  
41 experiments were carried out. This research aimed to uncover the mechanism by which OCA may  
42 influence the functioning of Sertoli cells.

43 **Results:** A pronounced reduction in OCA content was observed in the serum of patients with severe  
44 spermatogenesis disorders, indicating that OCA deficiency is related to spermatogenic disorders.  
45 The protective effect of OCA on reproduction was tested in a mouse model with spermatogenic  
46 disorder induced by busulfan (30 mg/kg BW). The mice in the study were separated into distinct  
47 groups and administered varying amounts of OCA, specifically at doses of 32, 64, 128, and 256  
48 mg/kg. After evaluating sperm parameters, the most effective dose was determined to be 32 mg/kg.  
49 *In vivo* experiments showed that treatment with OCA significantly improved sperm quality,  
50 testicular histopathology and BTB integrity, which were damaged by busulfan. Moreover, OCA  
51 intervention reduced busulfan-induced oxidative stress and autophagy in mouse testes. *In vitro*,  
52 OCA pretreatment (100  $\mu$ M) significantly ameliorated Sertoli cell dysfunction by alleviating  
53 busulfan (800  $\mu$ M)-induced oxidative stress and autophagy. Moreover, rapamycin (5 mM)-induced  
54 autophagy led to Sertoli cell barrier dysfunction, and OCA administration exerted a protective effect  
55 by alleviating autophagy.

56 **Conclusions:** This study demonstrated that OCA administration suppressed oxidative stress and  
57 autophagy to alleviate busulfan-induced BTB damage. These findings provide a deeper  
58 understanding of the toxicology of busulfan and a promising avenue for the development of novel  
59 OCA-based therapies for male infertility.

60

61 **Keywords:** Medium-chain fatty acids, octanoic acid, busulfan, spermatogenesis disorder, blood–  
62 testis barrier, autophagy, oxidative stress, male infertility.

63

## 64 Introduction

65 Infertility has emerged as a significant global health concern, and male factors contribute to at least

66 50% of cases [1,2]. Spermatogenesis disorders represent one of the most severe and intricate  
67 manifestations of male infertility. In recent decades, significant progress has been made by scientists  
68 toward comprehending the underlying causes and mechanisms associated with spermatogenesis  
69 disorders. Various adverse factors, including genetic mutations, environmental influences, and  
70 exposure to chemotherapy drugs, can contribute to spermatogenesis disorders [2–4]. Busulfan, a  
71 commonly used alkylating agent with nonspecific effects, is frequently given as a preparatory  
72 regimen before allogeneic hematopoietic stem cell transplantation. Studies have shown that it can  
73 lead to disruptions in male sperm production [5,6]. Animal models induced by Busulfan for studying  
74 spermatogenesis disorders are widely used to explore the mechanisms of new medications and  
75 therapies for male infertility [7].

76

77 Despite the availability of assisted reproductive technology (ART) as a viable approach to address  
78 specific fertility challenges, the universal applicability of these technologies remains limited [8].  
79 Furthermore, despite encouraging outcomes observed following the administration of recently  
80 identified compounds like liver growth factor (LGF), melatonin, <sup>1</sup>glial cell line-derived neurotrophic  
81 factor (GDNF), and others, rigorous investigations will be paramount to ascertain their long-term  
82 efficacy and safety, particularly in human subjects [9–11]. Consequently, there is an imperative need  
83 to discover novel therapeutic targets and enhance the efficacy of existing interventions for male  
84 infertility caused by spermatogenesis disorders.

85

86 Fatty acids are a category of organic compounds characterized by extended hydrocarbon chains.  
87 These biomolecules hold paramount significance within the body due to their roles in orchestrating  
88 multifaceted pathways, including contributing to the structural integrity of cellular membranes,  
89 modulating metabolic pathways, and actively participating in intricate physiological processes [12].  
90 Recent investigations have predominantly focused on elucidating the beneficial effects of  
91 unsaturated fatty acids in the context of male reproductive health. Consuming omega-3  
92 polyunsaturated fatty acids is thought to be important in preserving hormonal equilibrium,  
93 promoting the typical development of reproductive cells, and sustaining the structural integrity and  
94 motility of sperm [13–15]. Despite this, unsaturated fatty acids are inherently more prone to

oxidation and heat-induced breakdown compared to saturated fats, which can make them more challenging to acquire [16]. Therefore, a more comprehensive exploration is warranted to identify a fatty acid that is easily accessible and beneficial to male reproductive function.

Caprylic acid (OCA) is an eight-carbon<sup>18</sup> medium-chain saturated fatty acid commonly found in coconut oil and dairy products [17,18]. Several studies in humans have demonstrated the potential health benefits of OCA, including its ability to improve lipid metabolism and suppress inflammatory responses [19]. Additionally, OCA treatment has been shown to alleviate H<sub>2</sub>O<sub>2</sub>-induced oxidative stress, which can improve the development of liver disease [20]. Furthermore, OCA supplementation has been found to prevent lipopolysaccharide (LPS)-induced acute liver injury by upregulating autophagy [21]. Although OCA supplementation is potentially beneficial to human health, whether OCA plays a role in spermatogenesis and male reproductive health remains unclear.

Hypothesized from these inquiries, it can be argued that OCA has the potential to reduce busulfan-induced damage in spermatogenesis, leading to improvements in male fertility. To verify this hypothesis, the potential therapeutic effects of OCA supplementation were firstly investigated using a busulfan-induced mouse model of spermatogenesis disorder and then determined the sperm quality and blood-testis barrier (BTB) integrity. The findings indicate that supplementation of OCA might potentially benefit spermatogenesis disorders and BTB damage, highlighting its potential as a treatment for male infertility. Furthermore, the therapeutic effect of OCA can be attributed to its ability to alleviate busulfan-induced oxidative stress and autophagy. The findings presented in this study provide valuable insights into how busulfan contributes to reproductive toxicity and the potential for developing more effective treatments for male infertility.

## **Materials and methods**

### **Analysis of human serum fatty acids and sperm quality**

During the period from September 2017 to January 2020, serum specimens were collected from thirty subjects experiencing spermatogenesis abnormalities. This group consisted of 24 patients diagnosed with nonobstructive azoospermia (NOA) and 6 with extreme oligospermia (EO).



124 Additionally, 30 individuals without any known fertility issues, who were in the process of receiving  
125 standard semen assessments at the medical laboratory, served as the control group (Supplementary  
126 Table S1). The participants in this study were between the ages of 20 and 43, and blood samples  
127 were collected between 8:00 and 11:00 am. Subsequently, centrifugation<sup>2</sup> at 1800×g for 10 min at  
128 room temperature was used to separate the serum. In previous research [22], the evaluation of serum  
129 levels of free fatty acids was outlined. Shanghai Applied Protein Technology Co. Ltd utilized GC/MS  
130 to measure<sup>1</sup> 39 medium- and long-chain free fatty acids (C6–C24). Sperm quality was assessed with  
131 the<sup>1</sup> WLJY-9000 computer-assisted system (WLJY-9000, WeiLi, Beijing, China). Collection of  
132 clinical samples was conducted with<sup>1</sup> informed consent and authorized by the Research Ethics  
133 Committee of Jinling Hospital.

#### 134 **Materials and reagents**

135 Thermo Fisher Scientific (Massachusetts, USA) provided the EZ-Link Sulfo-NHS-LC-Biotin  
136 (21335) Octanoic acid (OCA) (C2875), busulfan (55-98-1), and Alexa Fluor 488-conjugated  
137 streptavidin (S32354). Beyotime Biotechnology (Shanghai, China) provided the Protease inhibitor  
138 cocktail (P1005), phenylmethylsulfonyl fluoride (PMSF) (ST507), Rapamycin (S1842), Ad-GFP-  
139 LC3B (C3006), the Total Superoxide Dismutase (SOD) Assay Kit (S0101M), 2',7'-  
140 dichlorofluorescein diacetate (DCFH-DA) (S0033 M) and the Lipid Peroxidation Malondialdehyde  
141 (MDA) Assay Kit (S0131M). Nanjing KeyGen Biotechnology (Jiangsu, China) provided the CCK-  
142 8 assay kit. Vazyme Biotechnology (Nanjing, China) provided the HiScript III RT SuperMix for  
143 qPCR (R323) and AceQ qPCR SYBR Green Master Mix (Q121).

#### 144 **Animals and experimental design**

145 The research utilized 60 male C57BL/6 mice, aged<sup>11</sup> 4 weeks, obtained from Beijing Vital River  
146 Laboratory Animal Technology Co. Ltd (Beijing, China), for the purpose of conducting *in vivo*  
147 experiments. Fig. 2A depicts the experimental layout. Following a<sup>32</sup> 7-day acclimatization period, the  
148 mice were distributed randomly into six categories: control, busulfan alone, and four OCA therapy  
149 sets at doses of 32, 64, 128, and 256 mg/kg body weight (BW), with each group containing 10 mice.  
150 The control group received Coil oil orally for three weeks and then a<sup>30</sup> single intraperitoneal injection  
151 of DMSO. The busulfan alone group was given Coil oil orally and busulfan (30 mg/kg BW)  
152 injection intraperitoneally for 3 weeks. The OCA + busulfan group received OCA in Coil oil orally,



153 followed by a single intraperitoneal injection of busulfan (30 mg/kg). OCA treatment continued for  
154 five weeks, after which the mice were euthanized for testis sample collection and subsequent  
155 analysis.

156 The initial busulfan concentration was 30 mg/mL in DMSO, which was thoroughly mixed with an  
157 equivalent volume of PBS in an ultrasonic device at 37 °C to reduce its toxicity. The mice were first  
158 euthanized using ether and then sacrificed through cervical dislocation to collect testis and  
159 epididymis samples. Cervical dislocation post-anesthesia is deemed a humane euthanasia method  
160 as outlined in the Guide for the Care and Use of Laboratory Animals (Eighth Edition) by the  
161 Institutional Animal Care & Use Committee. The experimental protocols were conducted in  
162 adherence to the standards established by the National Laboratory Animal Care and Use Research  
163 Committee.

#### 164 **TM4 cell treatment**

165 To find the best treatment concentrations of OCA and busulfan, busulfan was dissolved in DMSO,  
166 while OCA was dissolved in alcohol and both were diluted in culture medium. Equal amounts of  
167 DMSO and alcohol were added to the control, busulfan, and OCA groups, at a final concentration  
168 of less than 0.1%. Based on previous studies [23], TM4 cells were either pretreated with OCA (100  
169 μM) for 2 h or exposed to busulfan (800 μM) for 24 h. The optimal OCA amount was established  
170 through the CCK-8 assay. Furthermore, in the rapamycin intervention experiments, TM4 cells were  
171 pre-exposed to OCA for 2 h before being subjected to rapamycin (5mM), as confirmed by the CCK-  
172 8 assay.

#### 173 **Sperm quality analysis**

174 The method for evaluating sperm quality was previously described [22]. The epididymides were  
175 recently transferred into HTF medium and were sliced into small fragments with ophthalmic scissors.  
176 Following an incubation period at 37 °C for 5 min, a hemocytometer (Qiujiing, located in Shanghai,  
177 China) was used to observe 10 μL of the sperm suspension with the assistance of a light microscope  
178 (Olympus, Tokyo, Japan). The numbers of forward-moving sperm, non-forward-moving sperm, and  
179 immobile sperm were counted separately.

#### 180 **Histology analysis of the testis and epididymis**

181 The samples from the testis and epididymis were fixed through immersing in Bouin's solution for

24 h, followed by dehydration using ethanol of varying concentrations. Subsequently, they were embedded in paraffin for the purpose of sectioning. Sections of tissue, 5  $\mu\text{m}$  thick, were then stained using hematoxylin and eosin (HE) before being captured and digitized under an optical microscope.

#### BTB integrity analysis

The evaluation of BTB integrity was carried out with a biotin tracer, as detailed in previous studies [24,25]. After receiving a 5-week busulfan treatment, three mice were chosen at random from each experimental group for additional analysis. Then mice were injected intraperitoneally with 1% sodium pentobarbital (5 mL/kg) to anesthetize. Incisions were created in the lower abdomen of the mice to expose their testes. Subsequently, 20  $\mu\text{L}$  of freshly prepared EZ-Link Sulfo-NHS-LC-Biotin in PBS with 1 mM  $\text{CaCl}_2$  was injected into the stroma of the upper, middle, and lower testicular regions. The testes were extracted after 30 min of diffusion and promptly frozen in liquid nitrogen for cryosectioning. The slices, 10  $\mu\text{m}$  in thickness, were immersed in 4% paraformaldehyde for 10 min, then treated with Alexa Fluor 488-labeled streptavidin for 1 h at room temperature. The specimens were then stained with DAPI and examined using a fluorescence microscope to visualize the seminiferous tubules. The assessment of BTB damage was determined using the subsequent equation: A total of 50-60 round or oval-shaped cross-sections of the seminiferous tubules were randomly examined in each group. For oval-shaped tubules, the  $D_{\text{biotin}}$  was computed as the average of the long and short axes of the tubule.

$$\text{The extent of BTB damage} = \frac{D_{\text{biotin}}}{D_{\text{radius}}} 100\%$$

( $D_{\text{biotin}}$ : the diffusion distance of biotin;  $D_{\text{radius}}$ : the radius of the tube)

#### Western blot

Testicular samples and cells were processed by undergoing different treatments and being lysed in RIPA buffer. The proteins were extracted by sonication on ice, followed by centrifugation at high speed and low temperature. Following the quantification of protein concentrations, protein (20  $\mu\text{g}$ ) was then resolved using SDS-PAGE, and later transferred to PVDF membranes (Millipore, Massachusetts, USA). Following the blocking process with BSA, both primary and secondary antibodies were added to the membranes. The primary antibodies were used in the present study: A ZO-1 rabbit pAb (21773-1-AP, ProteinTech, Wuhan, China), a Claudin11 rabbit pAb (AF5364, Affinity, Ohio, USA), a Claudin5 rabbit pAb (AF5216, Affinity), a Occludin rabbit pAb (13409-1-

211 AP, ProteinTech), a HO1/HMOX1 rabbit pAb (10701-1-AP, ProteinTech), a NQO1 rabbit pAb  
212 (11451-1-AP, ProteinTech), a SQSTM1/P62 rabbit mAb (ab109012, Abcam, Shanghai, China), a  
213 LC3B rabbit mAb (ab192890, Abcam). The visualization of the target protein bands was carried out  
214 using the Chemiluminescent Imaging System. The protein bands were subsequently quantified  
215 using ImageJ.

#### 216 **Analysis using real-time PCR**

217 Gene expression levels related to oxidative stress were measured through RT-PCR analysis in this  
218 investigation. After isolating total RNA from the testes using a Total RNA Purification Kit (082001,  
219 BEI-BEI Biotech, Zhengzhou, China), cDNA synthesis was conducted utilizing HiScript III RT  
220 SuperMix for qPCR following evaluation of RNA concentration and integrity. The quantitative  
221 analysis was carried out on a Roche LightCycler 96 Real-time PCR machine (Roche Diagnostics,  
222 Basel, Switzerland) using qPCR SYBR Green Master Mix. The reference gene  $\beta$ -actin served as the  
223 Uniform labeling, and gene expression values were calculated using the  $2^{-\Delta\Delta Cq}$  formula [26].  
224 Please see Table S3 for the primer sequences applied in the study.

#### 225 **Measurement of SOD and MDA**

226 In brief, the tissue samples were processed by homogenizing them and then centrifuging to extract  
227 protein samples. Following the prescribed protocol, the activity of SOD and the concentration of  
228 MDA were measured using specific assay kits.

#### 229 **Intracellular ROS quantification**

230 The levels of ROS within the cells were quantified utilizing a DCFH-DA fluorescent probe in  
231 adherence to the guidelines provided by the manufacturer. Following treatment, 10  $\mu$ M DCFH-DA  
232 solution in medium devoid of FBS was administered to each corresponding well. Afterward, the  
233 cells were incubated in a lightless setting at 37 °C for 20 min prior to being rinsed twice with  
234 medium devoid of FBS. The brightness of the fluorescence was captured with a fluorescence  
235 microscope.

#### 236 **Transepithelial electrical resistance (TER) evaluation**

237 To evaluate cell barrier performance in a controlled environment, TER was measured daily in three  
238 specific regions of the samples using a Milli-cell ERS apparatus (Millipore). Sertoli cells were  
239 initially inoculated in MilliCell Hanging Cell Culture Inserts (PET 0.4  $\mu$ m, Millipore) at a

concentration of  $0.5 \times 10^6$  cells/cm<sup>2</sup> and allowed to develop for three days to establish cellular barriers. Post-treatment, the Millicell Electrical Resistance System (Millipore) was used to capture the TER readings. The calculation of the TER value was determined by the following formula: TER ( $\Omega \cdot \text{cm}^2$ ) = (resistance from treatment ( $\Omega$ ) - initial resistance ( $\Omega$ ))  $\times$  surface area of membrane (cm<sup>2</sup>).

#### Statistical analysis

The data illustrated in this investigation were sourced from a minimum of three distinct *in vivo* specimens and three separate *in vitro* trials. The outcomes were visualized utilizing GraphPad Prism 7 (GraphPad Software, California, USA) and reported as the means  $\pm$  standard deviations (SD). Statistical significance across various groups was scrutinized utilizing SPSS 19.0 software (SPSS, Illinois, USA) through independent t-tests and one-way analyses of variance (ANOVAs) succeeded by post hoc assessments of least significant divergence (matching variances) or Games-Howell (mismatching variances). A significance level of  $P < 0.05$  was used to determine statistical relevance.

## Results

### Serum OCA levels are significantly lower in azoospermic patients

To identify the potential fatty acids that are potentially beneficial to male reproductive function, a comprehensive clinical analysis was performed. This analysis involved a comparative examination of the fatty acid compositions (C6-C24) of serum samples from two cohorts—30 healthy individuals and 30 patients—diagnosed as azoospermia (AZO), including NOA and EO. Through the application of GC/MS for quantifying the serum concentrations of 39 medium- and long-chain fatty acids, notable modifications were identified in the fatty acid composition within the serum of individuals compared with controls (Fig. 1A), showcasing a marked reduction in the levels of C6 and C8 fatty acids with statistical significance ( $P < 0.0001$ ) (Fig. 1B-C). Furthermore, a greater decrease in levels of octanoic acid (OCA, C6) was noted in the study (Fig. 1C), indicating that supplementing with OCA could potentially improve spermatogenesis. At the same time, there was a notable reduction ( $P < 0.0001$ ) in the production of inhibin B (INHB) (Fig. 1E), a reproductive hormone released by Sertoli cells, in the plasma of these individuals, whose sperm count exhibited a corresponding decline ( $P < 0.0001$ ) (Fig. 1D). These findings from the medical evaluation suggest a potential link between OCA deficiency and impaired Sertoli cell function.

269

## 270 **OCA improves spermatogenesis disorders in busulfan-treated mice**

271 To explore whether OCA supplementation can ameliorate spermatogenesis disorders and Sertoli cell  
272 dysfunction, a mouse model with impaired spermatogenesis was induced using a single  
273 intraperitoneal dose of busulfan. Subsequently, OCA was given to these mice orally, following the  
274 procedure depicted in Fig. 2A. Previous investigations have demonstrated that the highest dose of  
275 OCA (128 mg/kg) did not cause dose-limiting toxicity, and the most common adverse event  
276 observed was mild abdominal discomfort, indicating that administration of OCA via gavage is safe  
277 and reliable [27]. Therefore, four concentrations of OCA (32, 64, 128, and 256 mg/kg BW) were  
278 used to investigate the potential therapeutic effects of OCA via gavage (Fig. 2A).

279

280 Compared to the control, the OCA-receiving group exhibited a notable reduction in sperm  
281 concentration ( $P < 0.0001$ ), forward movement of sperm ( $P < 0.0001$ ), weight of the testis ( $P <$   
282  $0.0001$ ) and epididymis ( $P < 0.01$ ), and the coefficients of organs including the testis ( $P < 0.0001$ )  
283 and epididymis ( $P < 0.05$ ) (Fig. 2B-E, Fig. S1A-B), indicating the induction of spermatogenesis  
284 disorder by busulfan. However, mice administered each of the four doses of OCA (32, 64, 128, or  
285 256 mg/kg BW) displayed significantly elevated sperm concentrations, sperm progressive motility,  
286 testis and epididymis weights, and organ coefficients of the testis and epididymis relative to mice  
287 solely receiving busulfan (Fig. 2B-E, Fig. S1A-B), suggesting the successful amelioration of  
288 busulfan-induced spermatogenesis disorder through OCA administration. Furthermore, histological  
289 analysis of epididymal tubules using hematoxylin and eosin (HE) staining revealed a significant  
290 decrease in sperm density in the epididymal cauda of the mice in the busulfan group, which was  
291 also restored by OCA supplementation (Fig. S1C). Based on these results, it can be inferred that a  
292 clear therapeutic effect existed in the groups treated with OCA, and a better effect was observed at  
293 the lower concentration (32 mg/kg). Therefore, most of the following experiments were performed  
294 using this dose.

295 To determine the protective effects of OCA supplementation on testicular health, the histopathology  
296 of the testes was evaluated using HE staining. Fig. 2F illustrates testicular morphology of the  
297 busulfan group experienced noticeable changes in the seminiferous tubules, including atrophy,



298 vacuolation, and loss of germ cells. Conversely, the group supplemented with OCA showed well-  
299 organized seminiferous tubules and the reemergence of germ cells. Additionally, the dimensions of  
300 seminiferous tubules and the thickness of seminiferous epitheliums were both measured. A notable  
301 decline ( $P < 0.001$ ) was noted in these variables in the busulfan-treated group, whereas a rise ( $P <$   
302  $0.001$ ) was seen in the group treated with OCA (Fig. 2G-H). Furthermore, there was a notable  
303 increase in abnormal tubules (including empty and partial types) after busulfan administration, but  
304 this proportion was notably reduced in the OCA-administered group (Fig. 2I). These findings  
305 suggest that OCA supplementation can expedite the regeneration of spermatogenesis impaired by  
306 busulfan treatment in mice.

307

### 308 **OCA supplementation restores busulfan-disrupted BTB integrity in mouse testes**

309 To validate whether OCA supplementation could alleviate the effects of busulfan toxicity on  
310 spermatogenesis by restoring Sertoli cell function, a semiquantitative was employed *in vivo* assay  
311 in which biotin was used as an indicator. Demonstrated in Fig. 3A-B, a fully functional BTB  
312 obstructed the entry of biotin into the seminiferous lumen. This led to detection of streptavidin-488  
313 fluorescence solely within the testicular interstitium and basal membranes of the control group mice.  
314 In contrast, injection of busulfan resulted in a greater permeation distance of biotin by  
315 approximately 60% ( $P < 0.0001$ ), while supplementation with OCA reduced the leakage of biotin  
316 by approximately 17% ( $P < 0.001$ ), indicating that OCA treatment restored BTB integrity. Busulfan  
317 administration also significantly reduced<sup>24</sup> the levels of BTB-related connexins: ZO-1, occludin,  
318 claudin5 and claudin11 ( $P < 0.01$ ,  $P < 0.05$ ,  $P < 0.01$ ,  $P < 0.05$ , respectively) (Fig. 3C-H).  
319 Conversely, treatment with OCA led to a noticeable rise in the expression of these proteins ( $P <$   
320  $0.01$ ,  $P < 0.05$ ,  $P < 0.05$ ,  $P < 0.01$ ) (Fig. 3C-H). These results indicate that OCA may hold promise  
321 in ameliorating Sertoli cell dysfunction observed in mice treated with busulfan.

322

### 323 **OCA alleviates oxidative stress and autophagy induced by busulfan in mouse testes**

324 Previous studies have demonstrated that OCA can increase antioxidant capacity and regulate  
325 autophagy to benefit the functions of biological systems [21,28,29]. To explore whether OCA could  
326 alleviate oxidative stress levels to restore Sertoli cell dysfunction *in vivo*, testicular SOD activity

and MDA levels were assessed, which were significantly increased ( $P < 0.0001$ ) in the busulfan-treated group and decreased ( $P < 0.01$ ) in mice after OCA treatment (Fig. 4A-B). Additional studies were carried out to assess oxidative stress-related genes expression in testes. The mRNA levels of *Nqo1*, *Ho1*, *Cat*, and *Sod3* were significantly increased ( $P < 0.001$ ) by busulfan treatment but decreased ( $P < 0.001$ ) after OCA supplementation (Fig. 4C-F). Additionally, compared with busulfan treatment, OCA treatment significantly decreased the protein levels of NQO1 and HO1 ( $P < 0.05$ ,  $P < 0.001$ ) (Fig. 4G-I). In addition, the levels of autophagy-associated proteins LC3B and P62, representing autophagosome formation and breakdown, were assessed. Immunofluorescence staining demonstrated the presence of both LC3 and P62 in Sertoli and spermatogenic cell layers in the control group (Fig. 4G). After being exposed to busulfan, there was a marked rise in the LC3-II/LC3-I ratio ( $P < 0.05$ ), along with a significant drop in P62 levels ( $P < 0.001$ ) (Fig. 4K-M), indicating busulfan's ability to trigger autophagy and enhance autophagic breakdown in the testes. Conversely, supplementation with OCA resulted in contrasting trends in the LC3-II/LC3-I ratio and P62 expression levels compared to the busulfan group (Fig. 4K-M). The findings imply that OCA could mitigate the oxidative stress and autophagy caused by busulfan in the testes, thereby promoting the restoration of spermatogenesis and Sertoli cell function.

#### **OCA supplementation alleviates busulfan-induced oxidative stress and autophagy in TM4 Sertoli cells**

The study employed the Sertoli cell line TM4 to investigate the efficacy of OCA supplementation in reversing dysfunction in Sertoli cells by shielding them from oxidative stress and hindering autophagy *in vitro*. Cytotoxicity was initiated by subjecting TM4 cells to 800  $\mu$ M busulfan, followed by treatment with varying therapeutic concentrations of OCA (100, 200, or 400  $\mu$ M). Cell viability was assessed through a CCK-8 assay, as illustrated in Figure 5A. Interestingly, the administration of 100  $\mu$ M OCA led to a noteworthy enhancement ( $P < 0.05$ ) in cell viability. Therefore, subsequent therapeutic experiments were conducted *in vitro* using this dose. Transepithelial electrical resistance (TER) assays revealed that compared with busulfan treatment, OCA treatment notably increased ( $P < 0.01$ ) electrical resistance (Fig. 5B), indicating that OCA treatment protected against cell barrier damage caused by busulfan. Additionally, the OCA therapy effectively reduced the decrease in



BTB-related proteins (ZO-1 and Occludin) triggered by busulfan (Fig. 5C and 5E). Moreover, the levels of HO1, NQO1, P62 and LC3B proteins were analyzed in TM4 Sertoli cells (Fig. 5D-E). OCA intervention alleviated the reduction in P62 protein levels and the elevation in HO1 and NQO1 levels, as well as the LC3II/LC3I ratio compared to those in the busulfan-exposed group (Fig. 5D-E). Additionally, compared to busulfan treatment alone, OCA treatment significantly decreased the intracellular ROS levels and cytoplasmic GFP-positive puncta (Fig. 5F-G). This suggests that OCA treatment effectively mitigated the oxidative stress and autophagy triggered by busulfan *in vitro*, aligning with the outcomes of the conducted *in vivo* trials. These results suggest that OCA can improve busulfan-induced Sertoli cell dysfunction through the suppression of oxidative stress and autophagy.

#### OCA treatment alleviates TM4 cell damage by suppressing autophagy

To validate the role of autophagy in Sertoli cell barrier integrity and the therapeutic effect of OCA, rapamycin, an autophagy activator, was used to induce autophagy *in vitro*. Based on the results of the CCK-8 assay (Fig. 6A-B), 5  $\mu$ M rapamycin and 100  $\mu$ M OCA were employed in *in vitro* intervention assay. In vitro experiments showed that rapamycin, similar to the effect of busulfan, had a significant negative effect on Sertoli cell barrier function (Fig. 6C-E), indicating that activating autophagy can disrupt this important barrier. Additionally, in the OCA-treated group, there was a notable increase in electrical resistance and elevated protein levels of ZO-1 and Occludin compared to those in cells treated only with rapamycin. These findings strongly indicate that OCA plays a pivotal role in restoring Sertoli cell barrier function. Furthermore, compared with rapamycin treatment, supplementation with OCA induced a significant decrease in GFP-LC3 fluorescence and the LC3II/LC3I ratio (Fig. 6F-G) and an increase in P62 expression (Fig. 6H-I). These findings indicate that OCA treatment can rescue Sertoli cell barrier damage by inhibiting autophagy.

#### Discussion

In the course of this study, it was observed that individuals suffering from severe dyszoospermia exhibited a decrease in serum levels of OCA. This observation implies that supplementation with OCA could ameliorate spermatogenesis disorders (Fig. 1). In this study, it could be found that OCA

385 supplementation rescues spermatogenesis by reducing oxidative stress and autophagy levels in  
386 Sertoli cells.

387

388 Prior research has indicated that busulfan has the ability to inhibit spermatogenesis by harming germ  
389 cells directly or interfering with the BTB, resulting in male infertility [25,31]. A recent investigation  
390 by Zhao et al. suggested that Sertoli cells are vital in the progression of dyszoospermia [32]. An  
391 essential role of Sertoli cells is establishing the BTB, creating a specific environment for germ cell  
392 growth that is shielded from potentially harmful compounds and immune reactions towards sperm  
393 antigens [33]. In this study, it was demonstrated that OCA supplementation restored busulfan-  
394 induced damage to BTB integrity (Fig. 3). In addition it was noted the serum INHB levels were  
395 decreased in patients with clinical spermatogenic dysfunction (Fig. 1E). Additional studies have  
396 demonstrated that busulfan has adverse effects on Sertoli cells [34]. Given the above findings, the  
397 impact of OCA was focused on Sertoli cell. This research notably displayed the advantageous  
398 impacts of OCA on Sertoli cells and the BTB.

399

400 <sup>31</sup> Oxidative stress is a significant factor in male infertility, with an imbalance of ROS often cited as a  
401 main cause [35]. This imbalance has also been identified as a key contributor to busulfan-induced  
402 reproductive toxicity [36]. Accumulating *in vitro* and *in vivo* evidence has elucidated the  
403 multifaceted mechanisms by which OCA ameliorates various diseases, notably through the  
404 alleviation of oxidative stress [29,37]. In this study, it was found that OCA treatment effectively  
405 improved busulfan-induced oxidative stress in the testes. Additionally, *in vitro* study using TM4  
406 cells confirmed the ability of OCA to mitigate busulfan-induced oxidative stress.

407

408 Autophagy, a lysosomal catabolic mechanism present in all eukaryotes, is essential for maintaining  
409 a balanced cellular environment by degrading proteins and organelles [38]. This process is  
410 intimately linked to male reproduction [39], and dysregulation of autophagy in Sertoli cells has been  
411 linked to male infertility and testicular dysfunction, including BTB destruction [40]. Modulating  
412 autophagy is being explored as a promising therapeutic approach for Sertoli cell dysfunction. Recent  
413 studies have shown that enteral nutrition rich in OCA can prevent acute liver injury induced by LPS

414 through the upregulation of autophagy [21]. Therefore, autophagy may represent a potential  
415 mechanism by which OCA can improve Sertoli cell dysfunction. Furthermore, supplementation  
416 with OCA has been found to alleviate autophagy induced by busulfan or an autophagy agonist (Figs.  
417 4, 5 and 6), indicating its potential protective effects against BTB damage. These findings highlight  
418 the therapeutic value of targeting autophagy for treating male infertility.

419

420 Contrary to the results presented in this study, Wei and colleagues observed that busulfan suppresses  
421 autophagy by halting the breakdown of autophagosomes, leading to the impairment of  
422 spermatogonial cells [41]. However, this finding does not contradict this study, as the effect of  
423 autophagy on male fertility is twofold [42]. Optimal autophagy can shield cells effectively from  
424 unfavorable environmental conditions, such as hypoxia, lack of nutrients, oxidative stress, or the  
425 buildup of misfolded proteins. In times of stress, the upregulation of autophagy enables the cell to  
426 acclimate to changing surroundings and ensure its survival [43]. Nonetheless, excessive autophagy  
427 can result in the excessive consumption of proteins, harm to cell organelles, and impairment of  
428 cellular function, ultimately leading to defects in spermatogenesis and damages in the blood-testis  
429 barrier (BTB) [44–46]. This discovery implies that the status of autophagy may differ under varying  
430 treatments. In conjunction with the current study, these findings underscore the importance of  
431 autophagy in busulfan toxicology, as well as the protective influence of OCA by regulating  
432 autophagy.

433

434 It is noteworthy that in this investigation, no dose-response correlation was found with OCA, as  
435 mice receiving the lowest experimental dosage (32 mg/kg) showed marked enhancements.  
436 Remarkably, adding high doses of OCA has been found to produce adverse impacts on the growth  
437 of blastocysts, rates of hatching, speed of development, and overall cell count [30]. Therefore, it can  
438 be speculated that the administration of OCA is a double-edged sword and that high doses of OCA  
439 may have adverse effects on spermatogenesis development in mice, indicating that the amount of  
440 octanoic acid intake should be moderate. When OCA is used for the treatment of dyszoospermia, its  
441 dose should be precisely controlled to prevent its side effects.

442

443 Because of its reduced molecular size, OCA can be absorbed straight from the intestines, skipping  
444 the lymphatic system and entering the liver through the portal vein directly [47]. Studies have  
445 demonstrated that the concentration of OCA in plasma increases after oral OCA administration [27].  
446 According to a radiolabeled fatty acid tracer study, OCA can be rapidly transported into the central  
447 nervous system following oral administration [48]. These findings indicate that OCA can possibly  
448 reach testes through the blood circulation and exert its effects in the spermatogenesis  
449 microenvironment. The *in vitro* experiments confirmed the antioxidative and anti-autophagic effects  
450 of OCA on Sertoli cells. This, in turn, leads to an improvement in Sertoli cell barrier function,  
451 consistent with the outcomes of *in vivo* gavage studies. In addition, OCA can also be metabolized  
452 into small molecule substances (e.g., ketone bodies) or synthesized into long-chain fatty acids to  
453 exert their biological functions [49,50]. With respect to the functions of its metabolites, further  
454 investigations following a comprehensive<sup>42</sup> analysis of the fatty acid composition of the local  
455 testicular milieu will improve the understanding of how OCA works *in vivo*.

456

#### 457 **Strengths and limitations**

458 The research conducted focused on examining the effects of OCA on spermatogenesis disorder in  
459 mice induced by busulfan, specifically looking at how OCA can enhance spermatogenesis by  
460 safeguarding Sertoli cells. The results showed that OCA can reduce oxidative stress and regulate  
461 autophagy in Sertoli cells. This study is the inaugural attempt to investigate the therapeutic  
462 mechanism of OCA in addressing male infertility. It is hoped that OCA could be utilized as a  
463 promising dietary intervention to enhance spermatogenesis in individuals with male infertility issues.

464

465 However, in this research, the impacts of OCA were predominantly evaluated on Sertoli cells, while  
466 the effects of OCA on germ cells must not be disregarded and warrant future examination. If  
467 circumstances allow, single-cell omics may be utilized to examine the impacts of OCA on all cell  
468 types within the testis. Despite the results of this research supporting the idea that OCA could  
469 enhance spermatogenesis by mitigating oxidative stress and autophagy in Sertoli cells, the precise  
470 bioactive substances and metabolic components responsible for these therapeutic effects are still  
471 unclear. Therefore, further thorough and extensive analyses are necessary to illuminate these aspects

472 in forthcoming studies. Isotopic labeling and metabolomics can be employed to track OCA in vivo  
473 and analyze its specific metabolites, which will provide a clearer understanding of the active form  
474 of OCA in the testis.

475

## 476 **Conclusions**

477 Together, these findings suggest that OCA has the ability to efficiently revive sperm production and  
478 preserve BTB structure in busulfan-treated mice by inhibiting of oxidative stress and autophagy.  
479 Consuming a balanced diet rich in OCA could potentially improve male reproductive health. OCA  
480 shows promise as an innovative treatment option for male infertility, and incorporating OCA into  
481 regular dietary habits may enhance male fertility.

482

## 483 **Abbreviations**

|                   |                                                |
|-------------------|------------------------------------------------|
| ART               | assisted reproductive technology               |
| AZO               | azoospermia                                    |
| BTB,              | blood-testis barrier                           |
| BW                | body weight                                    |
| CAT               | catalase                                       |
| EO                | extreme oligospermia                           |
| GDNF              | glial cell line-derived neurotrophic<br>factor |
| HO1               | heme oxygenase-1                               |
| HTF               | human tubal fluid                              |
| LC3               | light chain 3                                  |
| LGF               | liver growth factor                            |
| LPS               | lipopolysaccharide                             |
| MDA               | malondialdehyde                                |
| NOA               | nonobstructive azoospermia                     |
| NQO1              | NAD(P)H, quinone oxidoreductase 1              |
| OCA               | octanoic acid                                  |
| <sup>20</sup> ROS | reactive oxygen species                        |
| SOD               | superoxide dismutase                           |
| SQSTM1/P62        | sequestosome 1                                 |

## 484 **Ethics approval**

485 Ethical guidelines established by relevant agencies govern all human experimentation and ensure  
486 that full consent is obtained from patients before experiments are conducted.<sup>3</sup> All animal experiments  
487 were systematically evaluated and sanctioned by the Animal Protection and Use Committee of

488 Jinling Hospital.

#### 489 **Funding**

490 Financial assistance for this investigation was provided by<sup>2</sup> the National Natural Science Foundation  
491 of China (U22A20277, 81901547, and 81971373) and the Jiangsu Provincial Medical Key  
492 Discipline Cultivation Unit (JSDW202215).

#### 493 **Author contributions**

494 Chun Cao, Hong Zhang and Zhaowanyue He<sup>38</sup> conducted the study, retrieved and analyzed the data,  
495 and drafted the article. Kemei Zhang, Zhang Qian, Jiaming Shen, and Lu Zheng conducted the  
496 investigations. Mengqi Xue, Shanshan Sun and Chuwei Li examined the data. Wei Zhao, Jun Jing  
497 and Rujun Ma helped perform the analysis. Xie Ge and Bing Yao: proposed the study, designed the  
498 investigation and revised<sup>13</sup> the manuscript. The final manuscript has been read and approved by all  
499 the authors.

#### 500 **Data availability**

501 The data will be made<sup>2</sup> available upon request.

#### 502 **Conflicts of Competing Interest**

503 The authors of this paper affirm that they have no discernible financial conflicts of interest or  
504 personal affiliations with any individuals or entities that may have influenced the findings presented  
505 herein.

506

#### 507 **Reference**

- 508 1. Eisenberg ML, Esteves SC, Lamb DJ, Hotaling JM, Giwercman A, Hwang K, et al. Male  
509 infertility. Nat Rev Dis Primers. 2023;9:49.
- 510 2. Vander Borcht M, Wyns C. Fertility and infertility: Definition and epidemiology. Clinical  
511 Biochemistry. 2018;62:2–10.
- 512 3. Sharma A, Minhas S, Dhillo WS, Jayasena CN, Sharma A, Minhas S, et al. Male infertility due  
513 to testicular disorders. J Clin Endocrinol Metab. 2021;106:e442–59.
- 514 4. Olesen IA, Sonne SB, Hoei-Hansen CE, Rajpert-DeMeyts E, Skakkebaek NE. Environment,  
515 testicular dysgenesis and carcinoma in situ testis. Best Practice & Research Clinical Endocrinology  
516 & Metabolism. 2007;21:462–78.
- 517 5. Bashir Q, Thall PF, Milton DR, Fox PS, Kawedia JD, Kebriaei P, et al. Conditioning with  
518 busulfan plus melphalan versus melphalan alone before autologous haemopoietic cell  
519 transplantation for multiple myeloma: an open-label, randomised, phase 3 trial. The Lancet  
520 Haematology. 2019;6:e266–75.
- 521 6. Poganitsch-Korhonen M, Masliukaite I, Nurmio M, Lähteenmäki P, van Wely M, van Pelt AMM,



et al. Decreased spermatogonial quantity in prepubertal boys with leukaemia treated with alkylating agents. *Leukemia*. 2017;31:1460–3.

7. Deng C-H, Liu G-H, Xie Y, Deng C-C, Ouyang B, Lv L-Y, et al. Establishing a nonlethal and efficient mouse model of male gonadotoxicity by intraperitoneal busulfan injection. *Asian J Androl*. 2020;22:184.

8. Jeyendran RS, Caroppo E, Rouen A, Anderson A, Puscheck E. Selecting the most competent sperm for assisted reproductive technologies. *Fertility and Sterility*. 2019;111:851–63.

9. Bhang DH, Kim B-J, Kim BG, Schadler K, Baek K-H, Kim YH, et al. Testicular endothelial cells are a critical population in the germline stem cell niche. *Nat Commun*. 2018;9:4379.

10. Pérez-Crespo M, Pericuesta E, Pérez-Cerezales S, Arenas MI, Lobo MV, Díaz-Gil JJ, et al. Effect of liver growth factor on both testicular regeneration and recovery of spermatogenesis in busulfan-treated mice. *Reprod Biol Endocrinol*. 2011;9:21.

11. Cui Y, Ren L, Li B, Fang J, Zhai Y, He X, et al. Melatonin Relieves Busulfan-Induced Spermatogonial Stem Cell Apoptosis of Mouse Testis by Inhibiting Endoplasmic Reticulum Stress. *Cell Physiol Biochem*. 2017;44:2407–21.

12. Jeon YG, Kim YY, Lee G, Kim JB. Physiological and pathological roles of lipogenesis. *Nat Metab*. 2023;5:735–59.

13. Jensen TK, Priskorn L, Holmboe SA, Nassan FL, Andersson A-M, Dalgård C, et al. Associations of Fish Oil Supplement Use With Testicular Function in Young Men. *JAMA Netw Open*. 2020;3:e1919462.

14. Jing J, Ouyang L, Zhang H, Liang K, Ma R, Ge X, et al. Omega-3 polyunsaturated fatty acids and its metabolite <sc>12-HEPE</sc> rescue busulfan disrupted spermatogenesis via target to <sc>GPR120</sc>. *Cell Proliferation*. 2023;n/a:e13551.

15. Collodel G, Moretti E, Noto D, Corsaro R, Signorini C. Oxidation of Polyunsaturated Fatty Acids as a Promising Area of Research in Infertility. *Antioxidants*. 2022;11:1002.

16. Wang C, Sun C, Lu W, Gul K, Mata A, Fang Y, et al. Emulsion structure design for improving the oxidative stability of polyunsaturated fatty acids. *Comp Rev Food Sci Food Safe*. 2020;19:2955–71.

17. Nevin KG, Rajamohan T, Nevin KG, Rajamohan T. Beneficial effects of virgin coconut oil on lipid parameters and in vitro LDL oxidation. *Clinical Biochemistry*. 2004;37:830–5.

18. German JB, Dillard CJ, German JB, Dillard CJ, German JB, Dillard CJ, et al. Saturated Fats: A Perspective from Lactation and Milk Composition. *Lipids*. 2010;45:915–23.

19. Zhang XS, Zhang P, Liu YH, Xu Q, Zhang Y, Li HZ, et al. Caprylic Acid Improves Lipid Metabolism, Suppresses the Inflammatory Response and Activates the ABCA1/p-JAK2/p-STAT3 Signaling Pathway in C57BL/6J Mice and RAW264.7 Cells. *Biomed Environ Sci*. 2022;35:95–106.

20. Wang D, Chen J, Sun H, Chen W, Yang X. MCFA alleviate H<sub>2</sub>O<sub>2</sub>-induced oxidative stress in AML12 cells via the ERK1/2/Nrf2 pathway. *Lipids*. 2022;57:153–62.

21. He K, Cao C, Xu X, Ye Z, Ma X, Chen W, et al. Octanoic acid-rich enteral nutrition prevented lipopolysaccharide-induced acute liver injury through c-Jun N-terminal kinase-dependent autophagy. *J Parenter Enteral Nutr*. 2022;46:1353–60.

22. Ge X, He Z, Cao C, Xue T, Jing J, Ma R, et al. Protein palmitoylation-mediated palmitic acid sensing causes blood-testis barrier damage via inducing ER stress. *Redox Biology*. 2022;54:102380.

23. Zhao J, Wang M, Wang Y, Xu J, Ma C, Tang Y, et al. Endoplasmic reticulum stress promotes blood-testis barrier impairment in mice with busulfan-induced oligospermia through PERK-eIF2 $\alpha$



566 signaling pathway. *Toxicology*. 2022;473:153193.

567 24. Jia X, Xu Y, Wu W, Fan Y, Wang G, Zhang T, et al. Aroclor1254 disrupts the blood–testis  
568 barrier by promoting endocytosis and degradation of junction proteins via p38 MAPK pathway. *Cell*  
569 *Death Dis*. 2017;8:e2823–e2823.

570 25. Jiang S, Xu Y, Fan Y, Hu Y, Zhang Q, Su W. Busulfan impairs blood–testis barrier and  
571 spermatogenesis by increasing noncollagenous 1 domain peptide via matrix metalloproteinase 9.  
572 *Andrology*. 2022;10:377–91.

573 26. Zhang X, Xue C, Xu Q, Zhang Y, Li H, Li F, et al. Analysis of Relative Gene Expression Data  
574 Using Real-Time Quantitative PCR and the 2– $\Delta\Delta$ CT Method. *Methods*. 2001;25:402–8.

575 27. Voller B, Lines E, McCrossin G, Tinaz S, Lungu C, Grimes G, et al. Dose-escalation study of  
576 octanoic acid in patients with essential tremor. *J Clin Invest*. 2016;126:1451–7.

577 28. Cansız D, Ünal İ, Üstündağ ÜV, Alturfan AA, Altinoz MA, Elmacı İ, et al. Caprylic acid  
578 ameliorates rotenone induced inflammation and oxidative stress in the gut-brain axis in Zebrafish.  
579 *Mol Biol Rep*. 2021;48:5259–73.

580 29. Wang D, Chen J, Sun H, Chen W, Yang X. MCFA alleviate H2O2-induced oxidative stress in  
581 AML12 cells via the ERK1/2/Nrf2 pathway. *Lipids*. 2022;57:153–62.

582 30. Fredrickson J, Krisher R, Morbeck DE. The impact of the protein stabilizer octanoic acid on  
583 embryonic development and fetal growth in a murine model. *J Assist Reprod Genet*. 2015;32:1517–  
584 24.

585 31. Thirouard L, Holota H, Monroe M, Garcia M, De Haze A, Saru J-P, et al. Analysis of the  
586 Reversible Impact of the Chemodrug Busulfan on Mouse Testes. *Cells*. 2021;10:2403.

587 32. Zhao L, Yao C, Xing X, Jing T, Li P, Zhu Z, et al. Single-cell analysis of developing and  
588 azoospermia human testicles reveals central role of Sertoli cells. *Nat Commun*. 2020;11:5683.

589 33. Mruk DD, Cheng CY, Mruk DD, Cheng CY, Mruk DD, Cheng CY, et al. The Mammalian  
590 Blood-Testis Barrier: Its Biology and Regulation. *Endocr Rev*. 2015;36:564–91.

591 34. Chen X, Liang M, Wang D. Progress on the study of the mechanism of busulfan cytotoxicity.  
592 *Cytotechnology*. 2018;70:497–502.

593 35. Bisht S, Faiq M, Tolahunase M, Dada R. Oxidative stress and male infertility. *Nat Rev Urol*.  
594 2017;14:470–85.

595 36. Zhang X, Xia Q, Wei R, Song H, Mi J, Lin Z, et al. Melatonin protects spermatogonia from the  
596 stress of chemotherapy and oxidation via eliminating reactive oxidative species. *Free Radical Bio*  
597 *Med*. 2019;137:74–86.

598 37. Sürmen MG, Sürmen S, Cansız D, Ünal İ, Üstündağ ÜV, Alturfan AA, et al. Amelioration of  
599 rotenone-induced alterations in energy/redox system, stress response and cytoskeleton proteins by  
600 octanoic acid in zebrafish: A proteomic study. *J Biochem & Molecular Tox*. 2022;36:e23024.

601 38. Mizushima N, Levine B. Autophagy in Human Diseases. Longo DL, editor. *N Engl J Med*.  
602 2020;383:1564–76.

603 39. Wang M, Zeng L, Su P, Ma L, Zhang M, Zhang Y zhen. Autophagy: a multifaceted player in  
604 the fate of sperm. *Genetics in Medicine*. 2022;28:200–31.

605 40. Liu C, Wang H, Shang Y, Liu W, Song Z, Zhao H, et al. Autophagy is required for ectoplasmic  
606 specialization assembly in sertoli cells. *Autophagy*. 2016;12:814–32.

607 41. Wei R, Zhang X, Cai Y, Liu H, Wang B, Zhao X, et al. Busulfan Suppresses Autophagy in  
608 Mouse Spermatogonial Progenitor Cells via mTOR of AKT and p53 Signaling Pathways. *Stem Cell*  
609 *Res Ther*. 2020;16:1242–55.

- 610 42. Yan Q, Zhang Y, Wang Q, Yuan L. Autophagy: A Double-Edged Sword in Male Reproduction.  
 611 IJMS. 2022;23:15273.
- 612 43. Horibe A, Eid N, Ito Y, Otsuki Y, Kondo Y. Ethanol-Induced Autophagy in Sertoli Cells Is  
 613 Specifically Marked at Androgen-Dependent Stages of the Spermatogenic Cycle: Potential  
 614 Mechanisms and Implications. IJMS. 2019;20:184.
- 615 44. Yang Q, Li F, Miao Y, Luo X, Dai S, Liu J, et al. CdSe/ZnS quantum dots induced  
 616 spermatogenesis dysfunction via autophagy activation. Journal of Hazardous Materials.  
 617 2020;398:122327.
- 618 45. Liu S, Huang L, Geng Y, He J, Chen X, Xu H, et al. Rapamycin inhibits spermatogenesis by  
 619 changing the autophagy status through suppressing mechanistic target of rapamycin-p70S6 kinase  
 620 in male rats. Mol Med Rep. 2017;16:4029–37.
- 621 46. Yi WEI, Xiang-Liang T, Yu Z, Bin L, Lian-Ju S, Chun-lan L, et al. DEHP exposure destroys  
 622 blood-testis barrier (BTB) integrity of immature testes through excessive ROS-mediated autophagy.  
 623 Genes & Diseases. 2018;5:263–74.
- 624 47. Kadota Y, Toyoda T, Hayashi-Kato M, Kitaura Y, Shimomura Y. Octanoic acid promotes  
 625 branched-chain amino acid catabolisms via the inhibition of hepatic branched-chain alpha-keto acid  
 626 dehydrogenase kinase in rats. Metabolism. 2015;64:1157–64.
- 627 48. Haynes VR, Michael NJ, van den Top M, Zhao F-Y, Brown RD, De Souza D, et al. A Neural  
 628 basis for Octanoic acid regulation of energy balance. Molecular Metabolism. 2020;34:54–71.
- 629 49. Carnielli VP, Sulkers EJ, Moretti C, Wattimena JLD, van Goudoever JB, Degenhart HJ, et al.  
 630 Conversion of octanoic acid into long-chain saturated fatty acids in premature infants fed a formula  
 631 containing medium-chain triglycerides. Metabolism. 1994;43:1287–92.
- 632 50. Jain S, Rai R, Singh D, Vohora D, Jain S, Rai R, et al. Octanoic acid a major component of  
 633 widely consumed medium-chain triglyceride ketogenic diet is detrimental to bone. Sci Rep.  
 634 2021;11:7003.

635

## 636 **Figure legends**

637 **Fig. 1 Analysis of fatty acid and INHB levels in the serum and sperm.** (A) Heatmap of the serum  
 638 fatty acid composition. Control, healthy individuals (n=30); AZO, patients with azoospermia (n=30)  
 639 AZO26, 28 and 30 represent EO, while the others represent NOA. (B-C) Fatty acid levels of C6 (B)  
 640 and C8 (C) in serum. (D) Sperm concentration. (E) Serum INHB levels. INHB, inhibin B. The data  
 641 are presented as the mean  $\pm$  SD. Statistical analyses were carried out using two-tailed Student's t  
 642 tests (\*\*\*\* $P < 0.0001$ ). EO, extreme oligospermia; NOA, nonobstructive azoospermia.

643

644 **Fig. 2 Experimental design and the effects of OCA and busulfan on spermatogenesis.** (A)  
 645 Experimental design. All animals were randomly divided into a control group, a busulfan group and  
 646 four treatment groups with OCA (32, 64, 128, and 256 mg/kg BW every two days). (B-E) Sperm  
 647 concentration (B), sperm PR (C), organ coefficient of the testis (D) and epididymis (E) of the mice

at 9 weeks after OCA treatment (n=7~10). (F) Representative photographs of testicular morphology with HE staining. Scale bars: 100  $\mu$ m and 20  $\mu$ m. The black asterisk (\*) stand for damaged spermatogenic tubules. SPG, spermatogonia; SPM, spermatocyte; SP, spermatozoa; SC, Sertoli cell. (G-H) The width of the seminiferous epithelium (G) and diameter of the seminiferous tubules (H) were calculated randomly from 50 cross-sections of round or nearly round seminiferous tubules (long axis: short axis < 1.2:1). (I) Proportion of different seminiferous tubules calculated from 10 random fields for each group. The data are presented as the mean  $\pm$  SD. Statistical analyses were carried out using one-way ANOVA followed by Tukey's post hoc test. \*\*\*\* $P$  < 0.0001 vs. the control group, ### $P$  < 0.0001 vs. the busulfan group.

**Fig. 3 The effects of OCA and busulfan on the blood-testes barrier in mice.** (A) Representative fluorescence images of BTB integrity detected by the biotin tracer assay. The white asterisk (\*) indicates the permeation of biotin into the seminiferous lumen. Scale bars: 100  $\mu$ m. (B) Box plot illustrating the extent of BTB damage, which was calculated randomly from 50-60 seminiferous tubules for each group. (C-D) Representative images of tight junction proteins were examined by western blotting in mouse testes (n=3). (E-H) The relative protein expression of ZO-1 (E), Occludin (F), Claudin5 (G) and Claudin11 (H) was quantified by ImageJ and normalized to vinculin or  $\beta$ -actin levels (n=3). The data are presented as the mean  $\pm$  SD. Statistical analyses were carried out using one-way ANOVA followed by Tukey's post hoc test. \* $P$  < 0.05, \*\* $P$  < 0.01, \*\*\*\* $P$  < 0.0001 vs. Control group, # $P$  < 0.05, ## $P$  < 0.01, #### $P$  < 0.0001 vs. Busulfan group. ZO-1, zona occluden-1.

**Fig. 4 Changes in oxidative stress levels in the testis after busulfan injection with or without OCA supplementation.** (A-B) SOD activity and MDA levels in the testes of mice (n=6~8). (C-F) The mRNA levels of NQO1 (C), CAT (D), SOD3 (E) and HO1 (F) were examined by qPCR and normalized to  $\beta$ -actin levels. (n=4~6). (G) Representative images of HO1 and NQO1 protein expression in testes were examined by western blotting. (H-I) The protein expression levels of HO1 (H) and NQO1 (I) were quantified by ImageJ and normalized to  $\beta$ -actin levels (n=3). (J) Representative immunofluorescence images of P62 (red) and LC3B (red) in the testis. Scale bar:

100  $\mu\text{m}$ . (K) Representative images of LC3B and P62 protein expression in testes were examined by western blotting (n=3). (L-M) The protein expression levels of P62 (L) and LC3B (M) were quantified by ImageJ and normalized to  $\beta$ -actin levels (n=3). The data are presented as the mean  $\pm$  SD. Statistical analyses were carried out using one-way ANOVA followed by Tukey's post hoc test. \* $P < 0.05$ , \*\*\* $P < 0.001$  vs. Control group, # $P < 0.05$ , ### $P < 0.001$  vs. Busulfan group. SOD: superoxide dismutase; CAT, catalase; NQO1: NAD(P)H, quinone oxidoreductase 1; HO1, heme oxygenase 1; P62, SQSTM1, sequestosome 1; LC3, light chain 3.

**Fig. 5 Effects of OCA and busulfan on oxidative stress in TM4 cells.** (A) Analysis of the cell survival-rescuing effects of OCA after busulfan treatment by CCK-8 (n = 5). (B) TER detection of TM4 cell barriers (n = 4). (C-D) Representative images of ZO-1, Occludin, HO1, NQO1, LC3B and P62 proteins were examined by western blotting. (E) The relative protein expression levels were quantified by ImageJ and normalized to  $\beta$ -actin or Vinculin levels (n=3). (F) Representative images of ROS generation in the busulfan group and OCA pretreatment group. Scale bar: 100  $\mu\text{m}$ . (G) Representative images of the formation of autophagosomes by GFP-LC3 immunofluorescence; scale bar = 10  $\mu\text{m}$ . Quantification of the number of GFP-positive puncta in each TM4 cell line (n=4). The data are presented as the means  $\pm$  SDs. Statistical analyses were carried out using one-way ANOVA followed by Tukey's post hoc test. \* $P < 0.05$ , \*\* $P < 0.01$ , \*\*\* $P < 0.001$ , \*\*\*\* $P < 0.0001$  vs. the control group; # $P < 0.05$ , ## $P < 0.01$  vs. the busulfan group. ZO-1, zona occluden-1; NQO1: NAD(P)H, quinone oxidoreductase 1; HO1, heme oxygenase 1; P62, SQSTM1, sequestosome 1; LC3, light chain 3.

**Fig. 6 The effect of rapamycin treatment with or without OCA supplementation on autophagy in TM4 cells.** (A) Analysis of cell viability after treatment with rapamycin (0, 0.1, 0.5, 1, 2, 5, 10, or 20  $\mu\text{M}$ ) for 24 h (n = 6). (B) Analysis of the cell survival-rescuing effects of OCA (100, 200, or 400  $\mu\text{M}$ ) after rapamycin treatment by CCK-8 (n = 5). (C) TER detection of TM4 cell barriers (n = 4). (D) Representative images of ZO-1 and Occludin proteins were examined by western blotting. (E) The relative protein expression levels were quantified by ImageJ and normalized to Vinculin levels (n=3). (F) Representative images of the formation of autophagosomes by GFP-LC3

706 immunofluorescence; scale bar = 10  $\mu$ m. (G) Quantification of the number of GFP-positive puncta  
 707 in each TM4 cell line; n=4. (H) Representative images of the LC3B and P62 proteins were examined  
 708 by western blotting. (I) The relative protein expression levels were quantified by ImageJ and  
 709 normalized to the  $\beta$ -actin levels (n=3). For A and B, statistical analyses were carried out using one-  
 710 way ANOVA followed by Dunnett's multiple comparisons test. For C-F, statistical analyses were  
 711 carried out using one-way ANOVA followed by Tukey's post hoc test. The data are presented as the  
 712 mean  $\pm$  SD. \* $P$  < 0.05, \*\* $P$  < 0.01, \*\*\*\* $P$  < 0.0001 vs. Control group, # $P$  < 0.05, ### $P$  < 0.001, vs.  
 713 Busulfan group. P62, SQSTM1, sequestosome 1; LC3, light chain 3; ZO-1, zona occluden-1.

714

715 **Fig. 7 Mechanistic diagram of OCA and busulfan regulating Sertoli cell barrier function.**

716 Busulfan induces oxidative stress and autophagy in Sertoli cells, leading to downregulation of  
 717 tight junction protein expression and ultimately disruption of the Sertoli cell barrier. Conversely,  
 718 OCA alleviated oxidative stress and autophagy to ameliorate Sertoli cell dysfunction induced by  
 719 busulfan. OCA, octanoic acid; ROS, reactive oxygen species; ZO-1, zona occluden-1; LC3II, light  
 720 chain 3 II.

721

722 **Fig. S1 The effect of OCA and BUS on spermatogenesis in mice.** (A-B) testis weight (A) and  
 723 epididymis weight (B) of the mice at 9 weeks after OCA treatment (n=7~10). (C) Representative  
 724 photographs of epididymal cauda with HE staining. Asterisk ( \*) indicated decrease of sperm  
 725 density in tubules of epididymal cauda. Scale bars: 100  $\mu$ m. Data are presented as mean  $\pm$  SD.  
 726 Statistical analyses were carried out using one-way ANOVA followed by Tukey's post hoc test. \* $P$   
 727 < 0.05, \*\* $P$  < 0.01, \*\*\*\* $P$  < 0.0001 vs. Control group, # $P$  < 0.05, ## $P$  < 0.01, ### $P$  < 0.001, #### $P$  <  
 728 0.0001 vs. Busulfan group.
